# Supplementary material for: Transcriptional profile of the spring freeze response in the leaves of bread wheat (Triticum aestivum L.)
Source: Springer Nature journal article supplement (doi:10.1007/s11738-012-1099-3), 2012-09-15
Supplement: MOESM1 [file 11738_2012_1099_MOESM1_ESM.doc]

**Supplementary Tables and Figures**

**Transcriptional profile of the spring freeze response in the leaves of bread wheat (*Triticum aestivum* L.)**

**ACTA PHISIOLOGIAE PLANTARUM**

Guozhang Kang1*;Gezi Li1;Wenping Yang2;Qiaoxia Han1;Hongzhen Ma1;Yonghua Wang1;Jiangping Ren1;Yunji Zhu1;Tiancai Guo1*

1National Engineering Research Centre for Wheat, Key Laboratory of Physiology, Ecology and Genetic Improvement of Food Crops in Henan Province, Henan Agricultural University*,* 450002, Zhengzhou, China. e-mail: zkangg@163.com. Tel/fax: +86-371-63558202

2Department of Agriculture,Henan Institute of Science and Technology, 453003, Xinxiang, China. e-mail: yangwenping1971@126.com. Tel: +86-0-15837397725

*Corresponding author: Tel/fax: +86-371-63558202

E-mail address: zkangg@163.com (G. Kang), tcaiguo@163.com (T. Guo)

| **Contents** |  | Page |
| --- | --- | --- |
| **Fig. S1** | Effect of five days of −5℃ freeze stress on wheat plant (Yumai 34 cv) survival | 1 |
| **Fig. S2** | Expression profiles of selected freeze-regulated genes in the microarray experiments confirmed by quantitative real-time PCR | 1 |
| **Table S1** | List of the gene-specific primers used for quantitative real-time PCR | 1 |
| **Table S2** | Genes were significantly regulated more than 2 fold score in wheat leaves assayed at 1 and 3 days after −5°C freeze stress and compared to those in subzero acclimation in wheat and in freeze stress in barley | 15 |


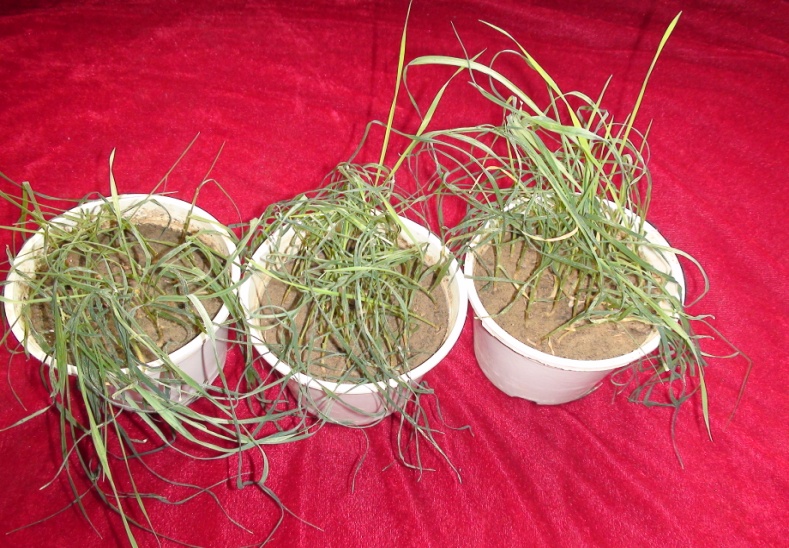


**Fig. S1** Effect of five days of −5℃ freeze stress on wheat plant (Yumai 34 cv) survival. The similar freeze injuries were also observed in other wheat cultivars and not indicated

**Fig. S2** Expression profiles of selected freeze-regulated genes in the microarray experiments confirmed by quantitative real-time PCR

Notes: CA669389, Cold acclimation induced protein 2-1 (Ta.351.1.S1_at); L11882, Wali5 protein (Ta.21350.1.S1_x_at); AB055077, Multidrug resistance protein 1 homolog (Ta.2793.1.S1_at); U73214, Cold acclimation protein WCOR518 (Ta.23758.1.S1_x_at); BQ789086, Ethylene-responsive factor-like transcription factor ERFL1a (Ta.14000.1.S1_at); AY525640, Delta-type tonoplast intrinsic protein (Ta.1082.3.S1_at); CK197611, Phenylalanine ammonia-lyase (Ta.20429.1.S1_at); BJ219268, NADPH-thioredoxin reductase (Ta.812.2.A1_x_at)

Each value was the mean ± SD of three independent measurements

**Table S1 List of the gene-specific primers used for quantitative real-time PCR**

| Probe set ID | Represent sequence ID | Primers | Predicated length (bp) |
| --- | --- | --- | --- |
| Ta.351.1.S1_at | CA669389 | 5' ATCGGCTACGCCATGCTA 3' | 131 |
| 5' TCACCAGCGGAAAACAAA 3' |
| Ta.21350.1.S1_x_at | L11882.1 | 5' CGGTGGACCCTGCAAGAA 3' | 107 |
| 5' CGCATAGGCACGATGACG 3' |
| Ta.2793.1.S1_at | AB055077.1 | 5' CACTGTTTTATTTGCCGT 3' | 120 |
| 5' TTCCTCTCAATCGTTTCA 3' |
| Ta.23758.1.S1_x_at | U73214.1 | 5' AGGTGCTCGTCAACCAATG 3' | 270 |
| 5' CCAACAGTTTCAGCGTATCG 3' |
| Ta.14000.1.S1_at | BQ789086 | 5' GACTCCTCGTCGGTCGTTG 3' | 235 |
| 5' AGGGCTCCTCGGTCTGTCTC 3' |
| Ta.1082.3.S1_at | AY525640.1 | 5' CCATCGCCTTCGGTCGCTT 3' | 137 |
| 5' GCCGCCGCTCACCTTAGTG 3' |
| Ta.20429.1.S1_at | CK197611 | 5' AAGGAGTGGAACGGTGAG 3' | 176 |
| 5' GCAATCTTTGGCAATACA 3' |
| Ta.2780.1.S1_at | BJ219268 | 5' CAAAGCAGCCATACAGCC 3' | 226 |
| 5' CGAGGTATCCGACTTCCAG 3' |

**Supplementary Table S2 Genes were significantly regulated more than 2 fold score in wheat leaves assayed at 1 and 3 days after −5°C freeze stress and compared to those in subzero acclimation in wheat and in freeze stress in barley**

| **Probe set ID** | **Functional description** | **Represent sequence ID** | **Ratio (1 d)** | **Ratio (3 d)** | **Subzero acclimation1** | | **Freeze in barley2** | |
| --- | --- | --- | --- | --- | --- | --- | --- | --- |
| **Probe set ID** | **up/**  **down** | **Probe set ID** | **up/**  **down** |
| Ta.12663.1.S1_at | Ice recrystallization inhibition protein 1 precursor | CK197682 | 101.772 | 755.606 |  |  |  |  |
| Ta.245.1.S1_at | Cold-responsive protein COR14b | AF207546.1 | 86.985 | 293.09 |  |  |  |  |
| Ta.13183.1.S1_x_at | Cold regulated protein | AB097412.1 | 66.412 | 259.781 |  |  |  |  |
| Ta.24728.1.S1_at | Wcor719 protein | U58278.1 | 54.65 | 51.306 |  |  |  |  |
| Ta.13183.1.S1_s_at | Cold regulated protein | AB097412.1 | 51.271 | 175.185 |  |  |  |  |
| Ta.1165.1.A1_at | WCOR14a | AF207545.1 | 48.587 | 96.529 |  |  |  |  |
| Ta.7091.1.S1_at | Pyrroline-5-carboxylate synthetase | CK194302 | 42.019 | 64.244 |  |  |  |  |
| Ta.2788.1.A1_at | Sucrose:sucrose 1-fructosytransferase | CF133273 | 36.595 | 28.003 |  |  |  |  |
| Ta.25843.1.A1_at | CBFIVc-B14 | CD453611 | 34.624 | 29.772 |  |  |  |  |
| Ta.20434.1.S1_at | Xylanase inhibitor TAXI-IV | CD910722 | 31.193 | 50.602 |  |  |  |  |
| Ta.27725.1.S1_at | Plasma membrane protein | AB030210.1 | 20.229 | 32.115 |  |  |  |  |
| Ta.18203.1.S1_at | Blue copper-binding protein homolog | AF031195.1 | 18.742 | 45.434 |  |  | Contig17750_at | up |
| TaAffx.129134.1.S1_at | Glycosyltransferase | CK153845 | 18.168 | 4.644 |  |  |  |  |
| Ta.3475.1.A1_at | Fructan:fructan 1-fructosyltransferase | CK206362 | 17.721 | 4.931 |  |  |  |  |
| Ta.14000.1.S1_at | Ethylene-responsive factor-like transcription factor ERFL1a | BQ789086 | 16.266 | 9.459 |  |  |  |  |
| Ta.145.1.A1_x_at | Wcs66 protein | L27516.1 | 14.608 | 171.92 |  |  |  |  |
| Ta.351.2.S1_x_at | Cold acclimation induced protein 2-1 | CA673444 | 14.366 | 34.429 |  |  |  |  |
| Ta.30336.1.S1_x_at | LEA D-11 dehydrin | AB076807.1 | 14.013 | 52.206 |  |  |  |  |
| Ta.351.1.S1_at | Cold acclimation induced protein 2-1 | CA669389 | 12.694 | 40.011 |  |  |  |  |
| Ta.30495.1.A1_s_at | CBFIVc-14.1 | CK214893 | 12.1 | 6.607 |  |  |  |  |
| TaAffx.129134.2.S1_at | Glycosyltransferase | CA641144 | 11.685 | 2.831 |  |  |  |  |
| TaAffx.92008.1.A1_s_at | Phenylalanine ammonia-lyase | CK163994 | 11.323 | 5.862 |  |  |  |  |
| Ta.2781.1.S1_at | AP2/EREBP type transcription factor | AF376136.1 | 11.071 | 4.79 |  |  |  |  |
| Ta.24748.1.S1_at | Na+/H+ antiporter | AY040246.2 | 10.503 | 5.522 |  |  |  |  |
| Ta.2793.1.S1_at | Multidrug resistance protein 1 homolog | AB055077.1 | 10.293 | 4.055 |  |  |  |  |
| Ta.4334.3.A1_a_at | Calcium-dependent protein kinase | CA706222 | 10.028 | 2.071 |  |  |  |  |
| Ta.1258.2.S1_x_at | S-adenosyl-L-homocysteine hydrolase | BJ317864 | 9.941 | 11.301 |  |  |  |  |
| Ta.28219.1.A1_at | Glutathione transferase | CA698466 | 9.834 | 18.045 |  |  | Contig1589_s_at | down |
| Ta.7151.1.S1_at | Fructan exohydrolase | BJ321663 | 9.182 | 8.047 |  |  |  |  |
| Ta.124.1.S1_x_at | Dehydrin | CK196594 | 9.112 | 17.39 | HVSMEa0006I22r2_s_at | up |  |  |
| Ta.28734.1.S1_x_at | Glycine-rich RNA-binding protein | CA725382 | 8.554 | 24.132 |  |  | HVSMEh0088I08r2_s_at | down |
| Ta.1258.1.S1_a_at | S-adenosyl-L-homocysteine hydrolase | L11872.1 | 8.272 | 9.171 |  |  |  |  |
| TaAffx.1024.1.A1_at | CBFIIId-A19 /// CBFIIId-B19 | CK216413 | 8.019 | 2.888 |  |  |  |  |
| Ta.28613.1.S1_at | Cold acclimation protein WCOR726 | U73213.1 | 7.936 | 14.497 |  |  |  |  |
| Ta.2882.1.S1_s_at | EF-hand Ca2+-binding protein CCD1 | AF181661.1 | 7.278 | 11.873 |  |  |  |  |
| TaAffx.92008.1.A1_at | Phenylalanine ammonia-lyase | CK163994 | 7.115 | 6.329 |  |  |  |  |
| Ta.1991.1.S1_at | Cold acclimation protein WCOR410c | BJ264076 | 7.004 | 8.889 |  |  |  |  |
| Ta.13255.1.S1_at | Dehydrin WZY1-1 | CK163939 | 6.639 | 18.825 |  |  |  |  |
| Ta.18487.2.S1_at | Cold-responsive protein | CA711116 | 6.636 | 120.471 |  |  |  |  |
| Ta.4678.2.S1_at | WRKY8 transcription factor | CK163938 | 6.39 | 9.82 |  |  |  |  |
| Ta.7378.21.S1_at | Histone H2B | BJ310041 | 6.214 | 2.354 |  |  | Contig1177_at | down |

*Continued Supplementary Table S2*

| **Probe set ID** | **Functional description** | **Represent sequence ID** | **Ratio (1 d)** | **Ratio (3 d)** | **Subzero acclimation1** | | **Freeze in barley2** | |
| --- | --- | --- | --- | --- | --- | --- | --- | --- |
| **Probe set ID** | **up/**  **down** | **Probe set ID** | **up/**  **down** |
| Ta.28539.1.A1_x_at | NAC domain transcription factor | BJ286857 | 6.172 | 11.46 |  |  |  |  |
| Ta.122.1.S1_x_at | Cold acclimation protein WCOR410b | U73210.1 | 6.022 | 8.455 |  |  |  |  |
| Ta.3760.2.A1_a_at | Beta 1,3-glucanase | CD935459 | 5.985 | 3.851 |  |  |  |  |
| Ta.28351.1.S1_at | Adenosine diphosphate glucose pyrophosphatase | CK215324 | 5.787 | 8.306 |  |  |  |  |
| Ta.23679.1.S1_at | Protein phosphatase 2C | BQ807036 | 5.776 | 3.688 |  |  |  |  |
| Ta.20401.1.S1_at | Shaggy-like kinase | BJ261212 | 5.739 | 2.935 |  |  |  |  |
| Ta.759.1.S1_at | Cold acclimation protein WCOR413 | U73216.1 | 5.717 | 41.097 |  |  | Contig3112_at | down |
| Ta.28351.1.S1_s_at | Adenosine diphosphate glucose pyrophosphatase | CK215324 | 5.572 | 7.198 |  |  |  |  |
| Ta.21262.1.A1_at | Xylanase inhibitor TAXI-III | CA642917 | 5.541 | 29.531 |  |  |  |  |
| Ta.123.1.S1_x_at | Cold acclimation protein WCOR80 | U73212.1 | 5.444 | 129.262 |  |  |  |  |
| Ta.4678.1.S1_x_at | WRKY8 transcription factor | CD935984 | 5.414 | 15.866 |  |  |  |  |
| Ta.2638.1.S1_at | Rab protein | X62476.1 | 5.383 | 44.785 |  |  |  |  |
| Ta.5367.1.S1_s_at | NAC domain transcription factor | CK193816 | 5.371 | 10.674 |  |  |  |  |
| Ta.30631.1.S1_at | S-like RNase | AY517470.1 | 5.344 | 2.256 |  |  |  |  |
| Ta.21262.1.A1_x_at | Xylanase inhibitor TAXI-III | CA642917 | 5.226 | 28.146 |  |  |  |  |
| Ta.4678.1.S1_at | WRKY8 transcription factor | CD935984 | 5.177 | 17.649 |  |  |  |  |
| Ta.21766.1.S1_at | PTACR7 | CK214787 | 5.144 | 71.296 |  |  |  |  |
| Ta.28351.1.S1_x_at | Adenosine diphosphate glucose pyrophosphatase | CK215324 | 5.123 | 7.229 |  |  |  |  |
| Ta.236.1.S1_at | MAP kinase homolog | AF079318.1 | 4.962 | 4.478 |  |  | Contig8078_at | down |
| Ta.2882.1.S1_at | EF-hand Ca2+-binding protein CCD1 | AF181661.1 | 4.874 | 6.076 |  |  |  |  |
| Ta.7151.1.S1_x_at | Fructan exohydrolase | BJ321663 | 4.758 | 3.11 |  |  |  |  |
| Ta.794.1.S1_at | QM | CK171366 | 4.601 | 9.746 |  |  |  |  |
| Ta.25469.1.S1_at | Cytochrome P450 | AY437442.1 | 4.523 | 4.322 | HU13P05r_at | up | Contig15786_at | down |
| Ta.22967.1.S1_x_at | pSBGer4 protein | CA690832 | 4.386 | 14.351 |  |  |  |  |
| Ta.21350.1.S1_x_at | Wali5 protein | L11882.1 | 4.367 | 20.485 |  |  |  |  |
| Ta.2791.1.S1_at | Temperature stress-induced lipocalin | BJ251528 | 4.257 | 6.172 |  |  |  |  |
| Ta.209.1.S1_at | S222 protein | AF031231.1 | 4.058 | 2.293 |  |  | Contig8749_at | down |
| TaAffx.10868.1.A1_at | MIKC-type MADS-box transcription factor WM24B | BJ230548 | 4.057 | 3.594 |  |  |  |  |
| Ta.2551.1.S1_at | Protein kinase | BE492852 | 3.941 | 5.552 |  |  |  |  |
| Ta.706.1.S1_s_at | Glucose-6-phosphate dehydrogenase | AB029454.1 | 3.899 | 10.55 | Contig9121_at | up |  |  |
| Ta.23176.1.S1_at | Protein phosphatase 2C | CK208784 | 3.879 | 2.796 |  |  |  |  |
| Ta.106.1.A1_at | Early light-inducible protein | AB019617.1 | 3.857 | 2.554 |  |  |  |  |
| Ta.4334.1.S1_at | Calcium-dependent protein kinase | CK205841 | 3.826 | 2.602 |  |  |  |  |
| Ta.23758.1.S1_x_at | Cold acclimation protein WCOR518 | U73214.1 | 3.814 | 14.25 |  |  |  |  |
| Ta.24254.3.S1_x_at | Ribosomal protein S29 | CA681727 | 3.591 | 0.474 |  |  |  |  |
| TaAffx.6606.1.S1_at | MADS-box transcription factor TaAGL33 | CA658343 | 3.53 | 3.285 |  |  |  |  |
| Ta.1347.1.S1_at | GTPase SAR1 | CA704375 | 3.463 | 5.789 |  |  |  |  |
| Ta.2780.1.S1_at | NADPH-thioredoxin reductase | BJ219268 | 3.452 | 9.269 |  |  |  |  |
| Ta.6301.2.S1_x_at | Calcium-dependent protein kinase 2 | CA630162 | 3.422 | 4.908 |  |  |  |  |
| Ta.234.1.S1_at | Low-affinity cation transporter | AF015523.1 | 3.404 | 6.964 |  |  |  |  |
| Ta.6556.1.S1_at | 14-3-3 protein | AF548740.1 | 3.337 | 2.019 |  |  |  |  |
| Ta.5856.1.S1_at | PTF1 | CD374119 | 3.33 | 2.748 |  |  |  |  |
| Ta.1138.1.S1_at | Cold-responsive LEA/RAB-related COR protein | AF255053.1 | 3.301 | 5.425 |  |  |  |  |

*Continued Supplementary Table S2*

| **Probe set ID** | **Functional description** | **Represent sequence ID** | **Ratio (1 d)** | **Ratio (3 d)** | **Subzero acclimation1** | | **Freeze in barley2** | |
| --- | --- | --- | --- | --- | --- | --- | --- | --- |
| **Probe set ID** | **up/**  **down** | **Probe set ID** | **up/**  **down** |
| Ta.4834.1.S1_at | Ornithine/acetylornithine aminotransferase | BQ803694 | 3.241 | 40.333 |  |  |  |  |
| Ta.4908.1.S1_at | Glycosyltransferase | CA602132 | 3.221 | 3.17 |  |  |  |  |
| Ta.746.3.S1_x_at | Translation initiation factor | BJ318989 | 3.176 | 2.623 |  |  |  |  |
| Ta.14168.1.S1_at | Proline-rich protein | BJ263863 | 3.111 | 6.54 |  |  |  |  |
| Ta.794.1.S1_x_at | QM | CK171366 | 3.057 | 4.837 |  |  |  |  |
| Ta.746.1.S1_a_at | Translation initiation factor | AF508969.1 | 3.043 | 2.327 |  |  |  |  |
| Ta.3679.1.S1_x_at | Glutathione transferase | CA733231 | 3.036 | 3.408 |  |  |  |  |
| TaAffx.120885.1.S1_s_at | S-adenosylmethionine decarboxylase precursor | CA694004 | 3.027 | 0.496 |  |  | Contig309_s_at | up |
| Ta.1071.1.S1_at | Glutaredoxin | AF542185.1 | 3.016 | 6.646 |  |  |  |  |
| Ta.207.1.S1_at | S276 protein | AF031194.1 | 3.003 | 7.536 |  |  |  |  |
| Ta.30944.1.S1_s_at | Glutathione transferase F2 | AJ440791.1 | 2.999 | 0.379 |  |  |  |  |
| TaAffx.49997.3.S1_s_at | Cryptochrome 2 | CA744881 | 2.978 | 13.596 | AF348460_at | up |  |  |
| Ta.4678.3.S1_x_at | WRKY8 transcription factor | CK215282 | 2.912 | 5.036 |  |  |  |  |
| Ta.5011.1.S1_at | Protein kinase | CK207059 | 2.91 | 2.783 |  |  |  |  |
| Ta.5174.2.S1_at | Nar2.1 protein | CK193743 | 2.899 | 7.618 |  |  |  |  |
| Ta.1071.1.S1_x_at | Glutaredoxin | AF542185.1 | 2.855 | 5.846 |  |  |  |  |
| Ta.5855.3.S1_a_at | FCA-A1 | AY230320.1 | 2.773 | 4.399 |  |  |  |  |
| Ta.9097.1.S1_x_at | Glutathione peroxidase-like protein | BJ254939 | 2.739 | 2.88 | Contig2454_at | up |  |  |
| Ta.7443.1.S1_at | Protein serine/threonine kinase-like | CK153462 | 2.711 | 6.319 |  |  |  |  |
| Ta.135.1.S1_at | Reversibly glycosylated polypeptide | BJ230302 | 2.692 | 4.193 |  |  |  |  |
| Ta.28852.1.S1_at | ETTIN-like auxin response factor | AY376128.1 | 2.689 | 3.527 |  |  |  |  |
| Ta.681.2.S1_a_at | Ferritin 1A /// ferritin 1B | CK197459 | 2.678 | 2.599 |  |  |  |  |
| Ta.4725.1.S1_at | WRKY transcription factor | CK195830 | 2.674 | 12.074 |  |  |  |  |
| Ta.6492.3.S1_s_at | Vacuolar proton ATPase subunit E | BJ220894 | 2.615 | 0.318 |  |  |  |  |
| Ta.15229.1.S1_at | Cryptochrome 2 | CA747122 | 2.601 | 8.532 | AF348460_at | up |  |  |
| Ta.27401.2.S1_x_at | 60s ribosomal protein L21 | BQ294638 | 2.539 | 3.479 |  |  |  |  |
| Ta.26928.1.S1_a_at | Fructan exohydrolase | CD454795 | 2.52 | 6.005 |  |  |  |  |
| Ta.74.1.S1_at | Protein disulfide isomerase 2 precursor | AF262980.1 | 2.513 | 4.099 |  |  |  |  |
| Ta.231.1.S1_x_at | Secretory protein | AF079526.1 | 2.494 | 4.778 |  |  |  |  |
| Ta.26928.2.S1_x_at | Fructan exohydrolase | AJ611876 | 2.494 | 6.54 |  |  |  |  |
| Ta.27448.1.S1_s_at | Cyc07 | AF542188.1 | 2.466 | 6.169 |  |  |  |  |
| Ta.2541.1.S1_x_at | Cold acclimation protein WCOR615 | U73217.1 | 2.464 | 3.042 | Contig4520_at | up |  |  |
| Ta.9421.1.S1_at | Basic region/leucine zipper protein | CA620843 | 2.413 | 2.889 |  |  |  |  |
| TaAffx.46097.1.S1_at | Rab protein | CD900463 | 2.355 | 2.609 |  |  |  |  |
| Ta.26928.1.S1_x_at | Fructan exohydrolase | CD454795 | 2.305 | 4.558 |  |  |  |  |
| Ta.5428.1.S1_at | Acyl transferase 3-like | BU100019 | 2.292 | 5.801 |  |  |  |  |
| Ta.9622.3.S1_a_at | DEAD-box ATPase-RNA-helicase | BJ278119 | 2.287 | 2.719 |  |  |  |  |
| TaAffx.82926.1.S1_s_at | Glutathione transferase | CA664790 | 2.259 | 8.406 |  |  |  |  |
| Ta.4601.2.S1_at | Beta-glucosidase | BJ310258 | 2.227 | 2.071 |  |  | rbah29m06_s_at | down |
| Ta.24663.1.S1_s_at | Glycosyltransferase | BJ296162 | 2.226 | 2.491 |  |  |  |  |
| Ta.2153.1.S1_s_at | Ribosomal protein L30 | CK165194 | 2.221 | 5.62 |  |  |  |  |
| Ta.3070.1.S1_a_at | Mitogen-activated protein kinase 2 | BJ229772 | 2.2 | 2.471 |  |  |  |  |
| Ta.796.1.S1_x_at | Protein disulfide isomerase | AF262981.1 | 2.195 | 4.752 |  |  |  |  |

*Continued Supplementary Table S2*

| **Probe set ID** | **Functional description** | **Represent sequence ID** | **Ratio (1 d)** | **Ratio (3 d)** | **Subzero acclimation1** | | **Freeze in barley2** | |
| --- | --- | --- | --- | --- | --- | --- | --- | --- |
| **Probe set ID** | **up/**  **down** | **Probe set ID** | **up/**  **down** |
| Ta.24130.1.S1_x_at | 60S ribosomal protein L15 | BU101253 | 2.193 | 5.322 |  |  |  |  |
| Ta.14528.1.S1_at | Histone deacetylase HDAC2 | BJ308556 | 2.186 | 3.649 |  |  |  |  |
| Ta.5298.1.A1_at | Dehydration responsive element binding protein | CD454920 | 2.186 | 2.099 |  |  |  |  |
| Ta.1989.3.S1_s_at | Glucose-6-phosphate dehydrogenase | CA679732 | 2.17 | 0.466 |  |  |  |  |
| Ta.222.1.S1_at | Small GTP-binding protein | AF112964.1 | 2.151 | 3.839 | HU02C06u_at | up |  |  |
| Ta.22579.1.S1_at | Glycosyltransferase | CA647988 | 2.12 | 3.667 |  |  |  |  |
| Ta.435.1.S1_at | Betaine-aldehyde dehydrogenase | AY050316.1 | 2.115 | 2.661 |  |  |  |  |
| Ta.23429.1.S1_at | Ribosomal protein S7 | CK203896 | 2.099 | 5.325 |  |  |  |  |
| Ta.39.3.S1_x_at | Starch branching enzyme I | BJ283967 | 2.094 | 5.671 |  |  |  |  |
| Ta.1317.1.S1_at | Initiation factor (iso)4F p28 subunit | M95818.1 | 2.068 | 3.439 |  |  |  |  |
| Ta.14635.1.S1_a_at | Ribosomal Pr 117 | AF479048.1 | 2.05 | 4.267 |  |  |  |  |
| Ta.39.3.S1_a_at | Starch branching enzyme I | BJ283967 | 2.041 | 5.512 |  |  |  |  |
| Ta.3070.1.S1_x_at | Mitogen-activated protein kinase 2 | BJ229772 | 2.034 | 2.028 |  |  |  |  |
| Ta.21342.1.S1_x_at | Chitinase 3 | AB029936.1 | 2.025 | 39.003 | Contig5995_at | up |  |  |
| Ta.6229.1.S1_at | Multidomain cystatin | AL829976 | 2.022 | 4.264 |  |  |  |  |
| Ta.260.1.S1_at | RNA-binding protein | AF315811.1 | 2.013 | 5.086 |  |  |  |  |
| Ta.14635.2.S1_a_at | Ribosomal Pr 117 | BJ225605 | 2.01 | 5.262 |  |  |  |  |
| Ta.3795.1.S1_x_at | Chlorophyll a/b-binding protein WCAB precursor | U73218.1 | -15.385 | -35.714 | Contig628_x_at | up |  |  |
| Ta.20429.1.S1_at | Phenylalanine ammonia-lyase | CK197611 | -7.407 | -9.615 |  |  |  |  |
| Ta.639.1.S1_at | Peptidylprolyl isomerase | CA713572 | -6.061 | -8.264 |  |  | Contig1690_s_at | down |
| Ta.25025.1.S1_x_at | Em protein | CD490538 | -5.525 | -3.472 |  |  |  |  |
| Ta.6812.1.S1_at | FD-like 15 protein | BJ310152 | -5.025 | -6.711 |  |  |  |  |
| Ta.6869.1.S1_at | ADP-glucose pyrophosphorylase small subunit | CD885283 | -4.717 | -8.621 |  |  |  |  |
| Ta.21348.1.S1_s_at | Sulfur-rich/thionin-like protein /// sulfur-rich/thionin-like protein | U32429.1 | -4.386 | -10.526 |  |  |  |  |
| Ta.21348.2.S1_at | Sulfur-rich/thionin-like protein /// sulfur-rich/thionin-like protein | AY253444.1 | -4.386 | -14.706 |  |  |  |  |
| Ta.96.1.S1_at | Ubiquitin carrier protein | M28059.1 | -4.255 | -4.016 |  |  | Contig1040_at | down |
| Ta.28069.1.A1_at | LSD1-type zinc finger protein | CD454289 | -4.184 | -12.5 | Contig6358_at | up |  |  |
| Ta.191.1.S1_at | Thiol protease | U32430.1 | -4.098 | -13.158 |  |  |  |  |
| TaAffx.66606.1.A1_at | Plasma membrane intrinsic protein | BG909021 | -4.098 | -10 |  |  |  |  |
| Ta.21348.1.S1_x_at | Sulfur-rich/thionin-like protein | U32429.1 | -3.861 | -10.309 |  |  |  |  |
| Ta.350.1.A1_s_at | CBFIIIa-6.2 | CD492203 | -3.759 | -3.69 |  |  |  |  |
| Ta.1404.1.S1_at | Ribulose bisphosphate carboxylase activase B | AF251264.1 | -3.65 | -6.849 |  |  |  |  |
| TaAffx.42397.1.A1_at | Receptor-like kinase protein | AY584533.1 | -3.65 | -2.283 |  |  |  |  |
| Ta.14572.1.S1_at | Isopentenyl pyrophosphate isomerase | BJ323156 | -3.61 | -5.814 |  |  |  |  |
| Ta.1848.2.S1_s_at | Aquaporin 1:2 | BJ230034 | -3.546 | -38.462 |  |  | Contig19393_at | down |
| Ta.27661.1.S1_at | Heat shock protein 16.9 | AJ614980 | -3.484 | -4.132 |  |  |  |  |
| Ta.25025.1.S1_at | Em protein | CD490538 | -3.436 | 3.448 |  |  |  |  |
| Ta.21038.1.S1_at | Ammonium transporter | CA601803 | -3.322 | 6.897 |  |  |  |  |
| Ta.1848.2.S1_x_at | Aquaporin 1:2 | BJ230034 | -3.3 | -47.619 |  |  |  |  |
| Ta.27312.1.S1_x_at | Ammonium transporter | BT009318.1 | -3.185 | -7.353 |  |  |  |  |
| Ta.5249.1.A1_at | Early nodule-specific-like protein ENOD8 gene | BJ254773 | -3.155 | -5.376 |  |  |  |  |
| Ta.1082.3.S1_at | Delta-type tonoplast intrinsic protein | AY525640.1 | -2.89 | -8.403 |  |  |  |  |

*Continued Supplementary Table S2*

| **Probe set ID** | **Functional description** | **Represent sequence ID** | **Ratio (1 d)** | **Ratio (3 d)** | **Subzero acclimation1** | | **Freeze in barley2** | |
| --- | --- | --- | --- | --- | --- | --- | --- | --- |
| **Probe set ID** | **up/**  **down** | **Probe set ID** | **up/**  **down** |
| Ta.24423.1.S1_s_at | Beta-expansin EXPB6 | CA638337 | -2.89 | -4.587 |  |  |  |  |
| Ta.29532.1.S1_at | Cold acclimation protein WCOR410c | CK208996 | -2.882 | -3.247 |  |  |  |  |
| Ta.28764.1.S1_at | Cysteine protease | AB109216.1 | -2.817 | -2.793 |  |  |  |  |
| Ta.21055.1.S1_at | Ubiquitin carrier protein | CA611040 | -2.762 | -2.049 |  |  |  |  |
| Ta.25528.1.S1_at | Starch synthase IIIb precursor | CD374000 | -2.747 | -6.536 |  |  |  |  |
| Ta.1082.3.S1_x_at | Delta-type tonoplast intrinsic protein | AY525640.1 | -2.717 | -2.747 |  |  |  |  |
| TaAffx.2456.2.S1_s_at | Alternative splicing regulator | CA700272 | -2.703 | -3.067 |  |  |  |  |
| Ta.21213.2.S1_x_at | Small subunit | CA736777 | -2.674 | -5.882 |  |  |  |  |
| Ta.2797.3.S1_x_at | ADP-glucose pyrophosphorylase | BJ237777 | -2.646 | -2.217 |  |  |  |  |
| Ta.25528.2.S1_at | Starch synthase IIIb precursor | BJ271418 | -2.564 | -2.475 |  |  |  |  |
| Ta.6594.1.S1_s_at | LSD1-type zinc finger protein | AJ612141 | -2.433 | -5.952 | Contig6358_at | up |  |  |
| Ta.28728.3.S1_at | Plasma membrane intrinsic protein | BJ284035 | -2.404 | -8.547 |  |  |  |  |
| Ta.13443.1.S1_at | Fatty acyl coA reductase | AJ459253.1 | -2.387 | -5.155 |  |  |  |  |
| TaAffx.92801.1.S1_at | Early nodule-specific-like protein ENOD8 gene | BJ246865 | -2.387 | -2.5 |  |  |  |  |
| Ta.28728.3.S1_x_at | Plasma membrane intrinsic protein | BJ284035 | -2.358 | -8.333 |  |  |  |  |
| TaAffx.130064.3.S1_x_at | High-affinity phosphate transporter PT1 | CA680862 | -2.237 | -2.545 |  |  |  |  |
| Ta.7378.16.S1_x_at | Protein H2B-6 | CD906311 | -2.222 | -6.098 |  |  |  |  |
| Ta.2576.1.S1_at | Elongation factor | CA502352 | -2.217 | -3.937 | Contig901_x_at | down |  |  |
| Ta.27501.1.S1_at | Myb-related protein | CD918722 | -2.208 | -2.398 |  |  |  |  |
| Ta.23825.1.S1_at | D1 protease-like protein precursor | CD452569 | -2.174 | -8.85 |  |  |  |  |
| Ta.16745.1.S1_s_at | Acyl transferase 5-like | CA635279 | -2.141 | -2.857 |  |  |  |  |
| Ta.5567.1.S1_at | Expansin EXPA3 | AY543529.1 | -2.132 | -15.385 |  |  |  |  |
| Ta.29331.1.S1_at | FD-like 6 protein | CK168067 | -2.092 | -2.967 |  |  |  |  |
| Ta.212.1.S1_at | Beta-tubulin 1 | U76744.1 | -2.075 | -2.353 |  |  |  |  |
| Ta.1364.1.S1_at | Geranylgeranyl hydrogenase | BJ219908 | -2.062 | -3.759 |  |  |  |  |
| Ta.30657.1.A1_at | NBS-LRR protein-like | BE591154 | -2.049 | -2.674 |  |  |  |  |
| Ta.13724.1.S1_at | FD-like 15 protein | BM134781 | -2.041 | -3.268 |  |  |  |  |
| Ta.25025.1.S1_s_at | Em protein | CD490538 | -2.024 | -2.427 |  |  |  |  |
| Ta.13195.3.S1_at | Glutaredoxin | BJ254074 | 18.155 |  |  |  |  |  |
| TaAffx.98930.1.A1_at | CBFIIId-12.1 /// CBFIIId-B12 | CK214676 | 17.706 |  |  |  |  |  |
| Ta.25920.1.A1_at | Myb-related protein | CD454396 | 12.657 |  |  |  |  |  |
| Ta.28244.1.A1_x_at | Endotransglucosylase/hydrolase XTH5 | CA631663 | 11.774 |  |  |  |  |  |
| Ta.28700.1.S1_at | Chalcone synthase | AY286097.1 | 11.752 |  |  |  |  |  |
| Ta.14632.1.S1_x_at | Glutathione transferase F3 | AJ440792.1 | 10.641 |  |  |  |  |  |
| Ta.14632.1.S1_at | Glutathione transferase F3 | AJ440792.1 | 10.301 |  |  |  |  |  |
| Ta.18397.1.A1_at | Flavonoid 3'-hydroxylase | CA634527 | 9.469 |  |  |  |  |  |
| Ta.28244.1.A1_s_at | Endotransglucosylase/hydrolase XTH5 | CA631663 | 6.472 |  |  |  |  |  |
| Ta.23763.1.S1_at | Lipoxygenase | CK213159 | 5.969 |  |  |  | Contig23795_at | down |
| Ta.7378.1.S1_x_at | Protein H2B-8 | D37943.1 | 5.61 |  |  |  |  |  |
| Ta.6053.1.S1_at | Mitogen-activated protein kinase MAPK1 | CA687955 | 5.502 |  |  |  |  |  |
| Ta.3475.2.S1_at | Fructan:fructan 1-fructosyltransferase | BJ222138 | 4.873 |  |  |  |  |  |
| Ta.7378.1.S1_at | Protein H2B-8 | D37943.1 | 4.573 |  |  |  |  |  |
| Ta.5616.3.S1_a_at | Putative GA receptor GID1 | CA610293 | 4.46 |  |  |  |  |  |

*Continued Supplementary Table S2*

| **Probe set ID** | **Functional description** | **Represent sequence ID** | **Ratio (1 d)** | **Ratio (3 d)** | **Subzero acclimation1** | | **Freeze in barley2** | |
| --- | --- | --- | --- | --- | --- | --- | --- | --- |
| **Probe set ID** | **up/**  **down** | **Probe set ID** | **up/**  **down** |
| Ta.2791.1.S1_at | Hemoglobin Hb1 | AY151390.1 | 4.121 |  |  |  |  |  |
| Ta.16678.1.S1_at | Triticain gamma | CA610848 | 3.501 |  |  |  |  |  |
| Ta.28219.2.S1_at | Glutathione transferase | CA663935 | 3.401 |  |  |  |  |  |
| Ta.6556.1.S1_x_at | 14-3-3 protein | AF548740.1 | 3.277 |  |  |  |  |  |
| Ta.7151.2.S1_at | Fructan exohydrolase | BJ319941 | 3.202 |  |  |  |  |  |
| Ta.103.1.S1_at | Zinc-finger protein WZF1 | D16416.1 | 3.193 |  |  |  | Contig10995_at | down |
| TaAffx.106421.1.S1_at | Zinc transporter ZIP | CD933478 | 3.068 |  |  |  |  |  |
| Ta.25520.1.S1_at | 1,3-beta-glucan synthase 12-like | BE492039 | 2.969 |  |  |  |  |  |
| Ta.5367.2.S1_x_at | NAC domain transcription factor | CA731144 | 2.947 |  |  |  |  |  |
| Ta.1842.1.S1_a_at | Phosphoethanolamine methyltransferase | CK166076 | 2.908 |  |  |  |  |  |
| Ta.9320.1.S1_x_at | CCoAMT protein | BT009093.1 | 2.855 |  |  |  |  |  |
| TaAffx.71213.1.S1_at | ELF3 protein | BE492034 | 2.676 |  |  |  |  |  |
| Ta.3070.2.S1_at | Mitogen-activated protein kinase 2 | CK209025 | 2.497 |  |  |  |  |  |
| TaAffx.70620.1.S1_at | 1-aminocyclopropane-1-carboxylate synthase | BQ802705 | 2.485 |  |  |  |  |  |
| Ta.3070.2.S1_x_at | Mitogen-activated protein kinase 2 | CK209025 | 2.403 |  |  |  |  |  |
| Ta.681.2.S1_x_at | Ferritin 1B | CK197459 | 2.381 |  |  |  | HV12A05u_s_at | down |
| Ta.10026.1.A1_at | Calcium-dependent protein kinase | BJ236992 | 2.353 |  |  |  |  |  |
| TaAffx.109978.2.S1_at | Glutaredoxin | CA665832 | 2.338 |  |  |  |  |  |
| Ta.701.1.S1_at | Omega-3 fatty acid desaturase | D84678.1 | 2.309 |  |  |  |  |  |
| Ta.681.2.S1_at | Ferritin 1B | CK197459 | 2.296 |  |  |  |  |  |
| Ta.22434.1.S1_x_at | 14-3-3 protein | CA745651 | 2.285 |  |  |  |  |  |
| Ta.1058.3.S1_x_at | S-adenosylmethionine decarboxylase precursor | CN013117 | 2.251 |  |  |  | Contig309_s_at | up |
| Ta.5856.2.S1_at | PTF1 | CA738591 | 2.251 |  |  |  |  |  |
| Ta.9166.3.S1_a_at | Serine/threonine kinase | CA638022 | 2.246 |  |  |  |  |  |
| Ta.16634.1.S1_x_at | Ethylene-responsive factor-like transcription factor ERFL2b | CA610190 | 2.229 |  |  |  |  |  |
| Ta.24150.1.S1_at | Glutathione-S-transferase 19E50 | AY064481.1 | 2.209 |  |  |  |  |  |
| Ta.961.2.S1_a_at | WRKY40 transcription factor | CA642180 | 2.202 |  |  |  |  |  |
| Ta.29622.1.S1_at | Fasciclin-like protein FLA1 | CK193208 | 2.18 |  |  |  |  |  |
| Ta.22434.1.S1_at | 14-3-3 protein | CA745651 | 2.168 |  |  |  |  |  |
| TaAffx.128418.92.A1_x_at | Glucose-6-phosphate dehydrogenase | CA695559 | 2.146 |  |  |  |  |  |
| Ta.27217.1.S1_at | Allene oxide synthase | AY196004.1 | 2.114 |  |  |  |  |  |
| Ta.6506.1.S1_at | P60 katanin | BJ272687 | 2.103 |  |  |  |  |  |
| Ta.16524.1.S1_at | MADS-box transcription factor TaAGL11 | CA607751 | 2.094 |  |  |  |  |  |
| Ta.177.1.S1_at | Cysteine proteinase inhibitor | AB038393.1 | 2.066 |  | HT08H03u_s_at | up |  |  |
| Ta.28332.1.S1_at | Probable kinase associated protein phosphatase | CD899227 | 2.056 |  |  |  |  |  |
| TaAffx.93901.1.S1_at | Protein kinase | CA604755 | 2.043 |  |  |  |  |  |
| Ta.166.1.S1_a_at | Cu/Zn superoxide dismutase | U69632.1 | 2.039 |  |  |  |  |  |
| Ta.4357.1.S1_at | dTDP-glucose-4-6-dehydratase-like protein | CA715084 | 2.03 |  |  |  |  |  |
| Ta.5140.1.S1_at | Multiple inositol polyphosphate phosphatase PhyIIa2 | BT009611.1 | 2.022 |  |  |  |  |  |
| Ta.1279.1.S1_at | Plastidic alpha 1,4-glucan phosphorylase | AY366475.1 | 2.01 |  |  |  |  |  |
| Ta.20121.1.S1_x_at | Endo-beta-1,3-glucanase | CA675578 | 2.002 |  |  |  |  |  |
| Ta.5818.1.S1_at | U2AF small subunit | CD915473 | -7.353 |  |  |  |  |  |

*Continued Supplementary Table S2*

| **Probe set ID** | **Functional description** | **Represent sequence ID** | **Ratio (1 d)** | **Ratio (3 d)** | **Subzero acclimation1** | | **Freeze in barley2** | |
| --- | --- | --- | --- | --- | --- | --- | --- | --- |
| **Probe set ID** | **up/**  **down** | **Probe set ID** | **up/**  **down** |
| Ta.188.1.S1_at | Hypothetical LOC543363 | U32427.1 | -5.464 |  |  |  | Contig4074_at | down |
| Ta.5818.1.S1_a_at | U2AF small subunit | CD915473 | -5.376 |  |  |  |  |  |
| Ta.22871.1.S1_s_at | Gamma-type tonoplast intrinsic protein | U86762.1 | -5.263 |  |  |  |  |  |
| Ta.24515.1.S1_at | HSP70 | AF005993.1 | -3.534 |  |  |  | L32165_s_at | down |
| Ta.2789.1.S1_at | Sucrose:fructan 6-fructosyltransferase | AB029887.1 | -3.378 |  |  |  |  |  |
| Ta.7378.32.S1_x_at | Protein H2B-6 | BF484590 | -2.874 |  |  |  |  |  |
| Ta.217.1.S1_x_at | Heat shock protein 80 | U55859.1 | -2.475 |  |  |  |  |  |
| Ta.10.2.S1_x_at | Beta glucanase | Z22873.1 | -2.475 |  |  |  |  |  |
| Ta.261.1.S1_at | Heat shock protein 101 | AF174433.1 | -2.439 |  |  |  |  |  |
| Ta.132.1.S1_a_at | Heat shock protein 16.9 | CD896621 | -2.404 |  |  |  |  |  |
| Ta.6632.1.S1_at | Homeodomain-leucine zipper transcription factor TaHDZipI-1 | CD938080 | -2.37 |  |  |  |  |  |
| Ta.10.1.S1_x_at | Beta glucanase | Z22874.1 | -2.342 |  |  |  |  |  |
| Ta.14431.1.S1_at | MBD1 | BJ263257 | -2.212 |  |  |  |  |  |
| Ta.21092.1.S1_at | Alkaline invertase | CA650885 | -2.174 |  |  |  |  |  |
| Ta.7378.13.S1_at | Histone H2B | CA502238 | -2.165 |  |  |  | Contig1177_at | down |
| Ta.10.1.S1_a_at | Beta glucanase | Z22874.1 | -2.101 |  |  |  |  |  |
| Ta.7479.2.S1_x_at | Lt1.1 protein | BE517160 |  | 237.42 |  |  |  |  |
| Ta.7479.1.S1_a_at | Lt1.1 protein | BE405183 |  | 174.481 |  |  |  |  |
| Ta.28782.1.S1_x_at | pSBGer2 protein | Y09916.1 |  | 102.444 |  |  |  |  |
| Ta.23797.1.S1_x_at | Group 3 late embryogenesis abundant protein (LEA) | AY148490.1 |  | 35.981 | Contig4760_s_at | up | Contig3842_s_at | down |
| Ta.24806.1.S1_x_at | BZIP transcription factor | CK209820 |  | 22.067 |  |  |  |  |
| Ta.22673.1.S1_s_at | Germin protein precursor | M21962.1 |  | 19.56 |  |  |  |  |
| Ta.5024.1.S1_x_at | Wali6 protein | L28009.1 |  | 19.362 |  |  |  |  |
| Ta.92.1.S1_s_at | Sucrose synthase type I | CD869165 |  | 16.304 | Contig460_s_at | up |  |  |
| Ta.5480.2.S1_at | Urate oxidase | BQ280758 |  | 14.114 |  |  |  |  |
| Ta.169.1.S1_x_at | Germin-like protein | CA652856 |  | 12.729 |  |  |  |  |
| Ta.24806.2.S1_a_at | BZIP transcription factor | BQ171259 |  | 11.471 |  |  |  |  |
| Ta.24806.2.S1_at | BZIP transcription factor | BQ171259 |  | 10.939 |  |  |  |  |
| Ta.27750.1.S1_at | pSBGer3 protein | CD373503 |  | 10.515 |  |  |  |  |
| Ta.812.2.A1_x_at | Alpha tubulin-4B | CK205899 |  | 9.628 |  |  |  |  |
| Ta.2690.1.S1_at | Glutamine-dependent asparagine synthetase | BT009245.1 |  | 8.965 |  |  |  |  |
| Ta.5385.1.S1_at | Peroxidase | X85228.1 |  | 8.063 |  |  |  |  |
| Ta.81.1.S1_at | Phosphoenolpyruvate carboxylase | BU099491 |  | 7.985 |  |  |  |  |
| Ta.6227.1.S1_at | Small GTP-binding protein | CA634975 |  | 7.884 |  |  |  |  |
| Ta.24806.3.S1_at | BZIP transcription factor | BE418064 |  | 7.859 |  |  |  |  |
| TaAffx.49997.3.S1_at | Cryptochrome 2 | CA744881 |  | 7.626 | AF348460_at | up |  |  |
| Ta.28784.1.S1_x_at | Cold acclimation protein WCOR825 | U73215.1 |  | 7.5 |  |  |  |  |
| Ta.10215.1.S1_at | Gigantea | AF543844.1 |  | 7.428 |  |  |  |  |
| TaAffx.49997.1.S1_at | Cryptochrome 2 | CD924582 |  | 6.974 | AF348460_at | up |  |  |
| Ta.8482.1.A1_at | WRKY27 transcription factor | BQ161961 |  | 6.409 |  |  |  |  |
| Ta.14421.1.S1_at | NADP-dependent malic enzyme | BJ238807 |  | 6.212 |  |  |  |  |
| TaAffx.9231.2.S1_s_at | CBFIVd-B22 | CK216114 |  | 5.997 |  |  |  |  |
| Ta.25053.1.S1_at | Thaumatin-like protein | AF442967.1 |  | 5.917 |  |  |  |  |

*Continued Supplementary Table S2*

| **Probe set ID** | **Functional description** | **Represent sequence ID** | **Ratio (1 d)** | **Ratio (3 d)** | **Subzero acclimation1** | | **Freeze in barley2** | |
| --- | --- | --- | --- | --- | --- | --- | --- | --- |
| **Probe set ID** | **up/**  **down** | **Probe set ID** | **up/**  **down** |
| Ta.5480.1.S1_x_at | Urate oxidase | CK199090 |  | 5.666 |  |  |  |  |
| Ta.28340.1.S1_at | USP family protein | BJ263506 |  | 5.648 |  |  |  |  |
| Ta.116.1.S1_at | Cla30 protein | BE404653 |  | 5.628 |  |  |  |  |
| Ta.27713.3.A1_x_at | Elongation factor-1 alpha | BJ296599 |  | 5.419 |  |  |  |  |
| TaAffx.122374.1.A1_at | TaCBF2 | BE517594 |  | 5.357 |  |  |  |  |
| Ta.14635.3.S1_x_at | Ribosomal Pr 117 | BJ231529 |  | 5.351 |  |  |  |  |
| Ta.2784.1.A1_at | Chitinase 1 | AB029934.1 |  | 5.335 |  |  |  |  |
| TaAffx.86552.1.S1_x_at | Urate oxidase | CA605903 |  | 5.32 |  |  |  |  |
| Ta.19248.1.S1_at | Cold acclimation protein COR413 | AY181206.1 |  | 5.32 |  |  |  |  |
| Ta.28331.1.S1_x_at | Ribosomal protein L2 | CK168580 |  | 5.297 |  |  |  |  |
| Ta.14203.1.S1_at | Cytoplasmatic ribosomal protein S13 | CD872409 |  | 5.279 |  |  |  |  |
| Ta.30950.1.A1_x_at | Fructan 6-exohydrolase | BJ219294 |  | 5.265 |  |  |  |  |
| Ta.5140.1.S1_at | Multiple inositol polyphosphate phosphatase PhyIIa2 | BT009611.1 |  | 5.261 |  |  |  |  |
| Ta.19248.1.S1_x_at | Cold acclimation protein COR413-TM1 | AY181206.1 |  | 5.194 |  |  |  |  |
| Ta.28331.1.S1_at | Ribosomal protein L2 | CK168580 |  | 5.177 |  |  |  |  |
| Ta.24553.1.A1_at | Oxalate oxidase | CA662341 |  | 5.067 |  |  |  |  |
| Ta.14274.1.S1_a_at | Hypothetical LOC543076 | BJ307984 |  | 5.014 |  |  |  |  |
| Ta.7314.1.S1_at | Myb-related protein | CF133748 |  | 4.944 |  |  |  |  |
| Ta.9226.1.S1_at | Pathogenesis-related protein 4 | CD915938 |  | 4.906 |  |  |  |  |
| Ta.1192.2.S1_s_at | Root abundant protein | BJ270766 |  | 4.882 |  |  |  |  |
| Ta.10084.1.S1_at | High-affinity phosphate transporter PT1 | AF110180.1 |  | 4.714 |  |  |  |  |
| Ta.789.1.S1_a_at | Elongation factor 1 beta' | D13147.1 |  | 4.711 |  |  |  |  |
| TaAffx.129134.1.S1_at | Glycosyltransferase | CK153845 |  | 4.644 |  |  |  |  |
| TaAffx.49997.2.S1_at | Cryptochrome 2 | CA738951 |  | 4.586 | AF348460_at | up |  |  |
| Ta.1409.1.S1_x_at | Vacuolar proton-inorganic pyrophosphatase | BJ242752 |  | 4.578 |  |  | Contig385_s_at | down |
| Ta.27713.1.A1_x_at | Elongation factor-1 alpha | CD879558 |  | 4.444 |  |  |  |  |
| Ta.7594.1.A1_s_at | MIKC-type MADS-box transcription factor WM19A | BJ219318 |  | 4.3 |  |  |  |  |
| Ta.659.1.S1_x_at | Translation elongation factor 1 alpha-subunit | BI751166 |  | 4.274 |  |  |  |  |
| Ta.231.1.S1_at | Secretory protein | AF079526.1 |  | 4.265 |  |  |  |  |
| Ta.12573.1.S1_at | Hypothetical LOC543010 | CD865637 |  | 4.223 |  |  |  |  |
| Ta.659.1.S1_at | Translation elongation factor 1 alpha-subunit | BI751166 |  | 4.208 |  |  |  |  |
| Ta.3326.2.S1_s_at | Acidic ribosomal protein P2 | CK170594 |  | 4.168 |  |  |  |  |
| Ta.5610.1.S1_at | Hemoglobin Hb1 | AY151390.1 |  | 4.143 |  |  |  |  |
| Ta.14579.1.S1_at | 20S proteasome beta 5 subunit | BJ217269 |  | 4.126 |  |  |  |  |
| Ta.12668.1.A1_at | Mitogen-activated protein kinase | CK196239 |  | 4.09 |  |  |  |  |
| Ta.24961.1.S1_x_at | BBC1-like protein | BQ805718 |  | 4.075 |  |  |  |  |
| Ta.22680.2.S1_a_at | Ribosomal protein L11 | CD916146 |  | 4.074 |  |  |  |  |
| Ta.3418.2.S1_at | Glutathione transferase F5 | BQ804925 |  | 4.036 |  |  |  |  |
| Ta.27401.1.S1_s_at | 60s ribosomal protein L21 | BJ308508 |  | 3.96 |  |  |  |  |
| TaAffx.65068.1.A1_at | MADS-box transcription factor TaAGL42 | BJ263737 |  | 3.958 |  |  |  |  |
| Ta.27401.1.S1_x_at | 60s ribosomal protein L21 | BJ308508 |  | 3.901 |  |  |  |  |
| Ta.812.1.S1_x_at | Alpha-tubulin | U76558.1 |  | 3.869 |  |  |  |  |
| Ta.7272.3.S1_x_at | Auxin amidohydrolase | CA735632 |  | 3.819 |  |  |  |  |

*Continued Supplementary Table S2*

| **Probe set ID** | **Functional description** | **Represent sequence ID** | **Ratio (1 d)** | **Ratio (3 d)** | **Subzero acclimation1** | | **Freeze in barley2** | |
| --- | --- | --- | --- | --- | --- | --- | --- | --- |
| **Probe set ID** | **up/**  **down** | **Probe set ID** | **up/**  **down** |
| Ta.14197.1.S1_at | RBP protein | BJ297511 |  | 3.797 |  |  |  |  |
| Ta.4876.1.A1_x_at | Peroxidase | X85230.1 |  | 3.749 |  |  |  |  |
| Ta.2777.2.S1_a_at | Small Ran-related GTP-binding protein | BJ318404 |  | 3.747 |  |  |  |  |
| Ta.28549.2.S1_a_at | Ribosomal protein L7 | BJ299871 |  | 3.745 |  |  |  |  |
| Ta.727.1.S1_x_at | LEA3 protein | AY148492.1 |  | 3.742 |  |  |  |  |
| Ta.304.1.S1_at | Ald protein | CK171609 |  | 3.729 |  |  |  |  |
| Ta.3372.1.S1_at | Translation initiation factor eIF5 | BJ275823 |  | 3.719 |  |  |  |  |
| Ta.23431.1.S1_at | Ribosomal protein L18 | BJ283471 |  | 3.693 |  |  |  |  |
| Ta.6301.1.S1_at | Calcium-dependent protein kinase 2 | CA654806 |  | 3.657 |  |  |  |  |
| Ta.2704.1.S1_at | Rab protein | X59133.1 |  | 3.621 |  |  |  |  |
| Ta.13008.1.S1_at | Galactinol synthase | CK210275 |  | 3.603 |  |  |  |  |
| Ta.24453.1.S1_s_at | Oxalate oxidase | CA615555 |  | 3.596 |  |  |  |  |
| Ta.24981.2.S1_a_at | 40S ribosomal protein S9 | BQ579730 |  | 3.595 | Contig11291_at | up |  |  |
| Ta.28131.1.S1_x_at | Alternative oxidase | CA632621 |  | 3.575 |  |  |  |  |
| Ta.23202.2.S1_s_at | Ribosomal protein P1 | BJ291603 |  | 3.573 |  |  |  |  |
| Ta.13785.1.S1_at | Xylanase inhibitor | CK198324 |  | 3.564 |  |  |  |  |
| Ta.1347.1.S1_x_at | GTPase SAR1 | CA704375 |  | 3.562 |  |  |  |  |
| Ta.6301.2.S1_a_at | Calcium-dependent protein kinase 2 | CA630162 |  | 3.548 |  |  |  |  |
| Ta.961.2.S1_a_at | WRKY40 transcription factor | CA642180 |  | 3.519 |  |  |  |  |
| Ta.7272.3.S1_a_at | Auxin amidohydrolase | CA735632 |  | 3.5 |  |  |  |  |
| TaAffx.81140.1.S1_s_at | Eukaryotic initiation factor 4B | CA689177 |  | 3.49 |  |  |  |  |
| Ta.807.1.S1_a_at | Ribosomal protein L13a | CK212376 |  | 3.489 |  |  |  |  |
| Ta.23202.1.S1_x_at | Ribosomal protein P1 | CA664020 |  | 3.474 |  |  |  |  |
| Ta.27765.2.S1_x_at | Ribosomal protein L39 | BJ228881 |  | 3.45 |  |  |  |  |
| Ta.21124.1.S1_x_at | Ethylene-responsive element binding protein 2 | CA614326 |  | 3.444 |  |  |  |  |
| Ta.2704.1.S1_x_at | Rab protein | X59133.1 |  | 3.403 |  |  |  |  |
| Ta.134.1.S1_at | Amylogenin | BJ286647 |  | 3.397 |  |  |  |  |
| Ta.1200.1.S1_at | Xylanase inhibitor protein I | CA665158 |  | 3.387 | Contig5996_s_at | up |  |  |
| Ta.30768.3.S1_x_at | High mobility group protein | BJ306990 |  | 3.333 |  |  |  |  |
| Ta.659.3.S1_x_at | Translation elongation factor 1 alpha-subunit | CD878859 |  | 3.317 |  |  |  |  |
| Ta.7443.2.S1_a_at | Protein serine/threonine kinase-like | CA647298 |  | 3.299 |  |  |  |  |
| Ta.1347.3.S1_x_at | GTPase SAR1 | BJ222560 |  | 3.293 |  |  |  |  |
| Ta.1200.1.S1_x_at | Xylanase inhibitor protein I | CA665158 |  | 3.277 | Contig5996_s_at | up |  |  |
| Ta.28131.1.S1_at | Alternative oxidase | CA632621 |  | 3.273 |  |  |  |  |
| Ta.10259.1.S1_at | Heat shock protein | BJ265952 |  | 3.265 |  |  |  |  |
| Ta.24130.2.S1_x_at | 60S ribosomal protein L15 | BQ807145 |  | 3.252 |  |  |  |  |
| Ta.7314.3.S1_s_at | Transcription factor Myb2 /// Myb-related protein | BJ215904 |  | 3.211 |  |  |  |  |
| Ta.22317.1.S1_s_at | Calreticulin-like protein | CD892646 |  | 3.204 |  |  |  |  |
| Ta.8348.1.A1_x_at | WRKY27 transcription factor | CK163988 |  | 3.199 |  |  |  |  |
| Ta.30768.1.S1_x_at | High mobility group protein | Z11540.1 |  | 3.172 |  |  |  |  |
| Ta.130.1.S1_at | Poly(A)-binding protein | BJ306263 |  | 3.13 |  |  |  |  |
| Ta.14557.1.S1_at | 20S proteasome beta 4 subunit | BJ307098 |  | 3.1 |  |  |  |  |
| Ta.22548.2.S1_x_at | Zinc transporter-like | CA652870 |  | 3.085 |  |  |  |  |

*Continued Supplementary Table S2*

| **Probe set ID** | **Functional description** | **Represent sequence ID** | **Ratio (1 d)** | **Ratio (3 d)** | **Subzero acclimation1** | | **Freeze in barley2** | | |
| --- | --- | --- | --- | --- | --- | --- | --- | --- | --- |
| **Probe set ID** | **up/**  **down** | **Probe set ID** | **up/**  **down** | |
| Ta.8228.1.S1_at | Hypothetical LOC543097 | BQ161624 |  | 3.068 |  |  |  |  | |
| Ta.27377.1.S1_x_at | Ubiquitin/ribosomal fusion protein | BJ230211 |  | 3.063 |  |  |  |  | |
| Ta.812.4.S1_x_at | Alpha tubulin-3A | BJ237929 |  | 3.06 |  |  |  |  | |
| Ta.3677.1.S1_at | Sucrose transporter SUT1A | AF408844.1 |  | 3.024 |  |  |  |  | |
| Ta.27765.3.S1_at | Ribosomal protein L39 | CD925325 |  | 3.022 |  |  |  |  | |
| Ta.28712.1.S1_x_at | Ribosomal protein L11 | BJ215705 |  | 3.014 |  |  |  |  | |
| Ta.304.2.S1_a_at | Ald protein | BJ282675 |  | 3.009 |  |  |  |  | |
| Ta.27765.3.S1_x_at | Ribosomal protein L39 | CD925325 |  | 2.987 |  |  |  |  | |
| Ta.2739.3.S1_x_at | Ribosomal protein L19 | BJ298795 |  | 2.974 |  |  |  |  | |
| Ta.27713.2.A1_x_at | Elongation factor-1 alpha | CD910422 |  | 2.967 |  |  |  |  | |
| Ta.23960.1.S1_at | ADP-ribosylation factor | BJ227403 |  | 2.962 |  |  |  |  | |
| Ta.13336.1.S1_at | Apetala2 protein | CK212277 |  | 2.946 |  |  |  |  | |
| TaAffx.115935.1.S1_x_at | Polyphenol oxidase /// polyphenol oxidase | AY596267.1 |  | 2.94 |  |  |  |  | |
| Ta.2794.1.S1_at | Ferredoxin | AF486634.1 |  | 2.911 |  |  |  |  | |
| Ta.4617.1.A1_x_at | Hypothetical LOC543011 | BJ268823 |  | 2.906 |  |  |  |  | |
| Ta.239.1.S1_at | Eukaryotic initiation factor 4B | CD930094 |  | 2.902 |  |  |  |  | |
| Ta.2739.1.S1_x_at | Ribosomal protein L19 | BQ801514 |  | 2.901 |  |  |  |  | |
| Ta.22548.1.S1_a_at | Zinc transporter-like | CA684451 |  | 2.897 |  |  |  |  | |
| Ta.5255.1.S1_at | Drought-responsive factor-like transcription factor DRFL1a | BT008937.1 |  | 2.893 |  |  |  |  | |
| Ta.659.2.S1_x_at | Translation elongation factor 1 alpha-subunit | CN012989 |  | 2.874 |  |  |  |  | |
| Ta.28712.1.S1_at | Ribosomal protein L11 | BJ215705 |  | 2.871 |  |  |  |  | |
| Ta.2739.4.S1_x_at | Ribosomal protein L19 | BJ321613 |  | 2.87 |  |  |  |  | |
| Ta.5480.3.S1_at | Urate oxidase | BJ276382 |  | 2.866 |  |  |  |  | |
| Ta.4609.1.S1_at | 1,3-beta-glucan synthase 23-like | BJ268643 |  | 2.857 |  |  |  |  | |
| Ta.304.1.S1_x_at | Ald protein | CK171609 |  | 2.845 |  |  |  |  | |
| Ta.23202.1.S1_at | Ribosomal protein P1 | CA664020 |  | 2.837 |  |  |  |  | |
| Ta.28553.1.S1_s_at | Ubiquitin /// ubiquitin | X56601.1 |  | 2.82 |  |  |  |  | |
| TaAffx.143995.17.S1_s_at | MADS-box protein TaVRT-1 | AY188331 |  | 2.815 |  |  |  |  | |
| Ta.28553.7.S1_at | Ubiquitin protein | BJ262528 |  | 2.806 |  |  |  |  |  |
| Ta.15.1.S1_at | TATA binding protein (TFIID) | CD453965 |  | 2.799 |  |  |  |  |  |
| Ta.6321.1.A1_at | LUE1 protein | CA500424 |  | 2.749 |  |  |  |  |  |
| Ta.2291.1.S1_x_at | ADP-ribosylation factor | CK215947 |  | 2.695 |  |  |  |  |  |
| Ta.27765.1.S1_x_at | Ribosomal protein L39 | CD937739 |  | 2.692 |  |  |  |  |  |
| Ta.28354.1.S1_at | Glutathione transferase | BJ267628 |  | 2.69 |  |  |  |  |  |
| TaAffx.129161.1.S1_at | Serine/threonine protein kinase 1 | CK210255 |  | 2.682 |  |  |  |  |  |
| Ta.7602.1.S1_at | Nucleosome assembly protein I | BJ250297 |  | 2.68 |  |  |  |  |  |
| Ta.28321.1.S1_a_at | Ubiquitin-conjugating enzyme | CK211481 |  | 2.677 |  |  |  |  |  |
| Ta.30628.2.S1_x_at | Ribosomal protein L36 | CK153899 |  | 2.667 |  |  |  |  |  |
| Ta.2423.1.S1_at | Calcium-dependent protein kinase | BT009467.1 |  | 2.653 |  |  |  |  |  |
| Ta.28553.7.S1_x_at | Ubiquitin protein | BJ262528 |  | 2.652 |  |  |  |  |  |
| Ta.226.1.S1_at | Cold-responsive LEA/RAB-related COR protein | AF139915.1 |  | 2.65 |  |  |  |  |  |
| Ta.2789.1.S1_a_at | Sucrose:fructan 6-fructosyltransferase | AB029887.1 |  | 2.645 |  |  |  |  |  |
| Ta.28291.1.S1_at | Ribosomal protein L6 | BJ318276 |  | 2.626 |  |  |  |  |  |

*Continued Supplementary Table S2*

| **Probe set ID** | **Functional description** | **Represent sequence ID** | **Ratio (1 d)** | **Ratio (3 d)** | **Subzero acclimation1** | | **Freeze in barley2** | |  |
| --- | --- | --- | --- | --- | --- | --- | --- | --- | --- |
| **Probe set ID** | **up/**  **down** | **Probe set ID** | **up/**  **down** |  |
| Ta.142.1.S1_at | MADS-box protein TaVRT-1 | AY280870.1 |  | 2.599 |  |  |  |  |  |
| Ta.241.1.S1_at | AKT1-like potassium channel | AF207745.1 |  | 2.596 |  |  |  |  |  |
| Ta.22548.1.S1_x_at | Zinc transporter-like | CA684451 |  | 2.589 |  |  |  |  |  |
| Ta.2656.1.S1_at | LON1 protease | AY494984.1 |  | 2.578 |  |  |  |  |  |
| Ta.7089.1.S1_at | Casein kinase-like protein | CD872336 |  | 2.571 |  |  |  |  |  |
| Ta.27765.4.S1_x_at | Ribosomal protein L39 | BJ231799 |  | 2.562 | Contig2448_s_at | up |  |  |  |
| Ta.6292.2.S1_a_at | Calcium-dependent protein kinase | CA640231 |  | 2.56 |  |  |  |  |  |
| Ta.24961.2.S1_x_at | BBC1-like protein | BJ284030 |  | 2.555 |  |  |  |  |  |
| Ta.28321.2.S1_x_at | Ubiquitin-conjugating enzyme | BQ805795 |  | 2.551 |  |  |  |  |  |
| Ta.30606.1.S1_s_at | Hypothetical LOC543377 | BQ162413 |  | 2.551 |  |  |  |  |  |
| Ta.9983.2.S1_at | Dihydroflavonol 4-reductase | AY555573.1 |  | 2.539 |  |  |  |  |  |
| Ta.28553.3.S1_at | Polyubiquitin | BJ274700 |  | 2.531 | Contig1058_x_at | down |  |  |  |
| Ta.1698.1.S1_at | Ribosomal protein l34 | BJ239378 |  | 2.524 |  |  |  |  |  |
| Ta.20554.1.S1_at | Cysteine protease | AJ612508 |  | 2.506 |  |  |  |  |  |
| Ta.2711.1.S1_x_at | Ubiquitin carrier protein | M62720.1 |  | 2.45 |  |  |  |  |  |
| TaAffx.56765.1.S1_at | Drought-responsive factor-like transcription factor DRFL1a | CA644884 |  | 2.449 |  |  |  |  |  |
| Ta.28553.12.S1_x_at | Polyubiquitin | BJ242344 |  | 2.441 | Contig1058_x_at | down |  |  |  |
| Ta.8547.1.S1_at | Initiation factor (iso)4f p82 subunit | M95747.1 |  | 2.432 |  |  |  |  |  |
| Ta.30736.2.A1_x_at | SPX129 | BJ321711 |  | 2.431 |  |  |  |  |  |
| Ta.10289.1.A1_at | Vernalization insensitive 3 | BJ249987 |  | 2.429 |  |  |  |  |  |
| Ta.144.1.S1_at | Wpk4 protein kinase | AB011670.1 |  | 2.421 |  |  |  |  |  |
| Ta.144.1.S1_s_at | Wpk4 protein kinase | AB011670.1 |  | 2.417 |  |  |  |  |  |
| Ta.2541.1.S1_s_at | Cold acclimation protein WCOR615 | U73217.1 |  | 2.4 | Contig4520_at | up |  |  |  |
| Ta.1136.1.S1_at | EREBP transcription factor | AF542184.1 |  | 2.394 |  |  |  |  |  |
| Ta.24466.1.S1_x_at | Thioredoxin h | CK213031 |  | 2.38 |  |  |  |  |  |
| Ta.19049.2.S1_a_at | Sucrose-phosphate synthase 7 | CA642364 |  | 2.38 |  |  |  |  |  |
| Ta.7314.1.S1_a_at | Myb-related protein | CF133748 |  | 2.367 |  |  |  |  | |
| Ta.2502.3.A1_at | HSP80-2 | BJ306224 |  | 2.364 |  |  |  |  | |
| Ta.2650.2.S1_x_at | Vacuolar proton-ATPase subunit A | BJ245450 |  | 2.351 |  |  |  |  | |
| Ta.27592.3.S1_x_at | Hypersensitive response protein | BQ246783 |  | 2.343 |  |  |  |  | |
| Ta.30730.1.S1_at | Thioredoxin H | AF420472.2 |  | 2.333 |  |  |  |  | |
| Ta.9622.2.S1_x_at | DEAD-box ATPase-RNA-helicase | CA605081 |  | 2.325 |  |  |  |  | |
| Ta.9622.2.S1_a_at | DEAD-box ATPase-RNA-helicase | CA605081 |  | 2.32 |  |  |  |  | |
| Ta.24981.1.S1_at | 40S ribosomal protein S9 | CA740068 |  | 2.307 |  |  |  |  | |
| Ta.28553.3.S1_x_at | Polyubiquitin | BJ274700 |  | 2.305 | Contig1058_x_at | down |  |  | |
| Ta.2650.1.S1_x_at | Vacuolar proton-ATPase subunit A | CK156172 |  | 2.299 |  |  |  |  | |
| Ta.20434.2.S1_x_at | Xylanase inhibitor TAXI-I | BE430407 |  | 2.264 |  |  |  |  | |
| Ta.2228.1.S1_a_at | Calmodulin TaCaM2-2 /// calmodulin TaCaM2-3 /// calmodulin TaCaM2-1 | U48692.1 |  | 2.26 |  |  |  |  | |
| Ta.1822.1.S1_at | Dynamin like Pr6(ADL6) | CK209268 |  | 2.254 |  |  |  |  | |
| Ta.2502.3.A1_x_at | HSP80-2 | BJ306224 |  | 2.24 |  |  |  |  | |
| Ta.28643.1.S1_s_at | Wali2 protein | CA652174 |  | 2.236 |  |  |  |  | |
| Ta.9097.1.S1_s_at | Glutathione peroxidase-like protein | BJ254939 |  | 2.231 | Contig2454_at | up |  |  | |
| Ta.30628.2.S1_at | Ribosomal protein L36 | CK153899 |  | 2.228 |  |  |  |  | |

*Continued Supplementary Table S2*

| **Probe set ID** | **Functional description** | **Represent sequence ID** | **Ratio (1 d)** | **Ratio (3 d)** | **Subzero acclimation1** | | **Freeze in barley2** | |
| --- | --- | --- | --- | --- | --- | --- | --- | --- |
| **Probe set ID** | **up/**  **down** | **Probe set ID** | **up/**  **down** |
| Ta.27765.6.S1_x_at | Ribosomal protein L39 | BJ318663 |  | 2.223 |  |  |  |  |
| Ta.9622.1.S1_x_at | DEAD-box ATPase-RNA-helicase | CK152265 |  | 2.218 |  |  |  |  |
| TaAffx.56088.1.S1_at | Sec61p | CA657493 |  | 2.216 |  |  |  |  |
| Ta.6350.3.S1_a_at | Calcium-dependent protein kinase /// calcium-dependent protein kinase | BJ235492 |  | 2.212 |  |  |  |  |
| Ta.2776.1.S1_at | 68 kDa protein HP68 | AY059462.1 |  | 2.209 |  |  |  |  |
| Ta.6293.1.A1_at | Alternative splicing regulator | CK209073 |  | 2.205 |  |  |  |  |
| Ta.24713.1.A1_s_at | Phytochelatin synthase | BJ274652 |  | 2.198 |  |  |  |  |
| Ta.1403.1.S1_s_at | Calmodulin TaCaM1-1 /// calmodulin TaCaM3-3 | U49103.1 |  | 2.198 |  |  |  |  |
| Ta.3126.1.S1_at | Acyl-[acyl-carrier protein] thioesterase | AJ488493.1 |  | 2.19 |  |  |  |  |
| Ta.7314.1.S1_x_at | Myb-related protein | CF133748 |  | 2.187 |  |  |  |  |
| Ta.247.1.S1_at | Sec61p | AF161718.1 |  | 2.175 |  |  |  |  |
| Ta.30628.3.S1_x_at | Ribosomal protein L36 | BJ288793 |  | 2.172 |  |  |  |  |
| Ta.224.1.S1_at | Chitinase IV precursor | AF112966.1 |  | 2.169 |  |  |  |  |
| Ta.27762.1.S1_x_at | Thaumatin-like protein | AF384146.1 |  | 2.165 |  |  |  |  |
| Ta.28325.1.S1_x_at | Formate dehydrogenase | CD877796 |  | 2.147 |  |  |  |  |
| TaAffx.98394.1.S1_at | Q-type C2H2 zinc finger protein | BQ800660 |  | 2.145 | Contig6358_at | up | Contig20981_at | up |
| Ta.2502.1.S1_a_at | HSP80-2 | BJ241868 |  | 2.118 |  |  |  |  |
| Ta.9912.1.S1_at | N-myristoyl transferase | CA747120 |  | 2.112 |  |  |  |  |
| TaAffx.51048.1.S1_at | Ubiquitin carrier protein | CA731723 |  | 2.109 |  |  |  |  |
| Ta.12565.3.S1_a_at | Ubiquitin-associated protein | CA705730 |  | 2.106 |  |  |  |  |
| TaAffx.29462.1.S1_s_at | Vacuolar proton-ATPase subunit A | CA642292 |  | 2.102 |  |  |  |  |
| Ta.27592.2.S1_a_at | Hypersensitive response protein | CD874179 |  | 2.101 |  |  |  |  |
| Ta.7979.1.A1_at | Wpk4 protein kinase | CK157049 |  | 2.1 |  |  |  |  |
| Ta.2502.1.S1_x_at | HSP80-2 | BJ241868 |  | 2.096 |  |  |  |  |
| Ta.21250.1.S1_at | MADS-box transcription factor TaAGL18 | BJ273029 |  | 2.093 |  |  |  |  |
| Ta.14604.1.S1_at | DREB transcription factor 6 | AF303376.1 |  | 2.083 |  |  |  |  |
| Ta.27765.5.S1_x_at | Ribosomal protein L39 | BJ220550 |  | 2.074 |  |  |  |  |
| TaAffx.70944.1.S1_s_at | Myb-related protein | BG606917 |  | 2.058 |  |  |  |  |
| Ta.4402.1.S1_at | Osjnba0067N01.15 protein | BQ169470 |  | 2.051 |  |  |  |  |
| Ta.29542.1.S1_x_at | Protein H2A | D38087.1 |  | 2.032 |  |  |  |  |
| Ta.23080.1.S1_at | J-domain protein | BJ320347 |  | 2.03 |  |  |  |  |
| Ta.24945.1.S1_at | Phosphoglycerate kinase | BJ317763 |  | 2.024 |  |  |  |  |
| Ta.2502.2.A1_x_at | HSP80-2 | CD865828 |  | 2.024 |  |  |  |  |
| Ta.812.3.S1_x_at | Alpha tubulin-3A /// alpha tubulin-3D | BJ217490 |  | 2.02 |  |  |  |  |
| Ta.336.2.S1_at | Flavonoid O-methyltransferase | BJ252644 |  | 2.015 |  |  |  |  |
| Ta.824.1.S1_a_at | Ribosomal protein L10A | BJ263208 |  | 2.001 |  |  |  |  |
| Ta.20804.2.S1_x_at | Adenosine diphosphate glucose pyrophosphatase | CK211106 |  | -62.5 |  |  |  |  |
| Ta.1197.1.S1_x_at | Alpha 1,4-glucan phosphorylase | AF275551.1 |  | -14.925 |  |  |  |  |
| TaAffx.53697.1.S1_x_at | Ubiquitin carrier protein | CA689880 |  | -12.987 |  |  |  |  |
| Ta.4001.1.S1_at | Phosphate transporter 2-1 | AY293827.1 |  | -12.048 |  |  |  |  |
| Ta.1197.1.S1_at | Alpha 1,4-glucan phosphorylase | AF275551.1 |  | -11.236 |  |  |  |  |
| Ta.27790.1.S1_s_at | Histone H1 WH1B.1 | AF107024.1 |  | -8.475 |  |  |  |  |
| TaAffx.8139.1.S1_s_at | Subtilisin protease | CD931425 |  | -8.13 |  |  |  |  |

*Continued Supplementary Table S2*

| **Probe set ID** | **Functional description** | **Represent sequence ID** | **Ratio (1 d)** | **Ratio (3 d)** | **Subzero acclimation1** | | **Freeze in barley2** | |
| --- | --- | --- | --- | --- | --- | --- | --- | --- |
| **Probe set ID** | **up/**  **down** | **Probe set ID** | **up/**  **down** |
| Ta.137.1.S1_at | Beta-amylase | Y16242.1 |  | -7.353 |  |  |  |  |
| Ta.27389.1.S1_at | Acidic ribosomal protein | BQ579004 |  | -6.757 |  |  |  |  |
| Ta.99.1.S1_at | O-acetylserine (thiol) lyase | CD866760 |  | -5.682 |  |  |  |  |
| Ta.99.1.S1_x_at | O-acetylserine (thiol) lyase | CD866760 |  | -5.65 |  |  |  |  |
| Ta.4537.1.S1_at | Pre-mRNA processing factor | CK217368 |  | -5.556 |  |  |  |  |
| Ta.4873.1.S1_at | Plastid omega-3 fatty acid desaturase | BJ228953 |  | -5.291 |  |  |  |  |
| Ta.17651.1.S1_at | Starch synthase IIb precursor | CA623105 |  | -5.128 |  |  |  |  |
| TaAffx.128418.64.A1_s_at | Histone H1 WH1A.1 | CK212972 |  | -5.128 |  |  |  |  |
| TaAffx.106302.1.S1_x_at | Type 1 non specific lipid transfer protein precursor | CA720594 |  | -4.878 |  |  |  |  |
| TaAffx.105423.1.S1_at | Plastid glutamine synthetase isoform GS2a | CA734634 |  | -4.854 |  |  |  |  |
| Ta.28955.1.S1_at | Peptidylprolyl isomerase | BJ275294 |  | -4.739 |  |  | Contig1690_s_at | down |
| Ta.1395.1.S1_at | Leucine zipper protein zip1 | BE430432 |  | -4.739 |  |  |  |  |
| Ta.7378.28.S1_x_at | Protein H2B-8 | BJ229643 |  | -4.566 |  |  |  |  |
| Ta.10480.1.S1_a_at | S-like RNase | AF495872.1 |  | -4.484 |  |  |  |  |
| Ta.13070.2.S1_a_at | Non-specific lipid transfer protein 1 precursor | CA630456 |  | -4.348 |  |  |  |  |
| Ta.18179.1.S1_at | Fasciclin-like protein FLA3 | CK207745 |  | -4.348 |  |  |  |  |
| Ta.6594.1.S1_at | LSD1-type zinc finger protein | AJ612141 |  | -4.255 | Contig6358_at | up |  |  |
| Ta.13070.2.S1_x_at | Non-specific lipid transfer protein 1 precursor | CA630456 |  | -4.184 |  |  |  |  |
| Ta.14183.1.S1_at | Hypothetical LOC543077 | AY123421.1 |  | -4.167 |  |  |  |  |
| Ta.2773.1.S1_at | Isoamylase | AF548380.1 |  | -4.132 |  |  |  |  |
| Ta.28793.1.S1_x_at | Histone H1 WH1A.3 | AF107026.1 |  | -4.098 |  |  |  |  |
| Ta.22831.1.S1_x_at | Membrane protein-like | CK211942 |  | -4.049 |  |  |  |  |
| Ta.24920.1.S1_x_at | Histone H1 WH1A.3 | AF107027.1 |  | -4 |  |  |  |  |
| Ta.22831.1.S1_at | Membrane protein-like | CK211942 |  | -3.802 |  |  |  |  |
| Ta.8629.1.A1_at | Lipid transfer protein | BQ162147 |  | -3.546 | Contig3776_s_at | up |  |  |
| Ta.11386.2.S1_x_at | Ascorbate peroxidase | AF532974.1 |  | -3.497 |  |  |  |  |
| Ta.1361.1.S1_s_at | Endotransglucosylase/hydrolase XTH2 | CK193247 |  | -3.401 |  |  |  |  |
| Ta.8554.1.S1_at | Lgul protein | BQ162050 |  | -3.367 |  |  |  |  |
| Ta.1544.1.S1_at | Beta-tubulin 2 | BJ264595 |  | -3.322 |  |  |  |  |
| Ta.238.1.S1_at | Granule-bound starch synthase GBSSII | AF109395.1 |  | -3.257 |  |  |  |  |
| Ta.28068.1.S1_at | Lgul protein | CD862522 |  | -3.236 |  |  |  |  |
| Ta.23833.1.S1_at | Histone H1 WH1A.1 | AF107023.1 |  | -3.205 |  |  |  |  |
| Ta.274.2.S1_x_at | Sucrose-6F-phosphate phosphohydrolase SPP3 | AY029159.1 |  | -3.165 |  |  |  |  |
| Ta.4878.1.S1_at | Endo-1,4-beta-glucanase | AY091512.1 |  | -3.135 |  |  |  |  |
| Ta.11386.2.S1_a_at | Ascorbate peroxidase | AF532974.1 |  | -3.135 |  |  |  |  |
| Ta.13070.1.S1_at | Non-specific lipid transfer protein 1 precursor | CK151761 |  | -3.106 |  |  |  |  |
| Ta.13961.1.S1_at | GATA-type zinc finger protein | BQ752827 |  | -2.994 | Contig6358_at | up |  |  |
| Ta.10966.1.S1_at | Homogentisate phytyltransferase VTE2-1 | BQ166918 |  | -2.967 |  |  |  |  |
| Ta.262.1.S1_at | Sucrose-6F-phosphate phosphohydrolase SPP1 | AF321556.1 |  | -2.95 |  |  |  |  |
| Ta.3253.1.S1_at | Hypersensitive induced response protein 3 | BJ276858 |  | -2.941 |  |  |  |  |
| TaAffx.81225.1.S1_at | Small subunit | CA688354 |  | -2.907 |  |  |  |  |
| Ta.2760.1.S1_at | Na+/H+ antiporter | AY040245.1 |  | -2.882 |  |  |  |  |

*Continued Supplementary Table S2*

| **Probe set ID** | **Functional description** | **Represent sequence ID** | **Ratio (1 d)** | **Ratio (3 d)** | **Subzero acclimation1** | | **Freeze in barley2** | |  |
| --- | --- | --- | --- | --- | --- | --- | --- | --- | --- |
| **Probe set ID** | **up/**  **down** | **Probe set ID** | **up/**  **down** |  |
| Ta.23704.1.S1_x_at | Glutathione transferase | AJ440795.1 |  | -2.882 |  |  |  |  |  |
| Ta.274.2.S1_at | Sucrose-6F-phosphate phosphohydrolase SPP3 | AY029159.1 |  | -2.865 |  |  |  |  |  |
| TaAffx.19661.2.S1_at | MADS-box transcription factor | CA727417 |  | -2.833 |  |  |  |  |  |
| Ta.262.1.S1_x_at | Sucrose-6F-phosphate phosphohydrolase SPP1 | AF321556.1 |  | -2.801 |  |  |  |  |  |
| Ta.39.1.S1_a_at | Starch branching enzyme I /// starch branching enyzyme 1 | AF076679.1 |  | -2.762 |  |  |  |  |  |
| TaAffx.7339.1.S1_at | SGT1-1 protein | CA661590 |  | -2.74 |  |  |  |  |  |
| Ta.581.2.S1_a_at | Hypothetical LOC543355 | CD862705 |  | -2.74 |  |  |  |  |  |
| Ta.93.1.S1_at | Sucrose synthase type 2 | M26672.1 |  | -2.703 | Contig460_s_at | up |  |  |  |
| Ta.1526.1.S1_at | Lipid transfer protein precursor | AF334185.1 |  | -2.674 |  |  |  |  |  |
| TaAffx.128896.17.S1_s_at | Ribulose-1,5-bisphosphate carboxylase/oxygenase large subunit | CA671219 |  | -2.646 |  |  |  |  |  |
| Ta.595.1.S1_at | Omega-6 fatty acid desaturase-like | CK207867 |  | -2.646 |  |  |  |  |  |
| Ta.1839.1.S1_x_at | Fasciclin-like protein FLA26 | CA603626 |  | -2.625 |  |  |  |  |  |
| Ta.3723.1.S1_at | Beta-tubulin 6 | CA638896 |  | -2.519 |  |  |  |  |  |
| Ta.277.1.S1_at | Pullulanase | CD452551 |  | -2.488 |  |  |  |  |  |
| Ta.27668.1.S1_at | H-protein | AF475101.1 |  | -2.463 |  |  |  |  |  |
| TaAffx.128493.1.A1_s_at | Folylpolyglutamate synthetase | CK170442 |  | -2.451 |  |  |  |  |  |
| Ta.23704.1.S1_s_at | Glutathione transferase /// Glutathione-S-transferase 19E50 | AJ440795.1 |  | -2.445 |  |  |  |  |  |
| Ta.1282.4.S1_at | Lipid transfer protein 3 | CA635994 |  | -2.433 |  |  |  |  |  |
| Ta.6411.1.S1_at | MADS-box transcription factor TaAGL14 | BJ311449 |  | -2.421 |  |  |  |  |  |
| Ta.85.1.S1_at | 23kDa oxygen evolving protein of photosystem II | CK208348 |  | -2.37 |  |  |  |  |  |
| Ta.2307.1.S1_at | Phosphoglycerate kinase | X15233.1 |  | -2.288 |  |  |  |  |  |
| Ta.2576.2.S1_at | Elongation factor | BJ321004 |  | -2.262 | Contig901_x_at | down |  |  | |
| Ta.8893.1.S1_at | Salt-stress responding gene | CD913711 |  | -2.222 |  |  |  |  | |
| Ta.6889.1.S1_at | MYB transcription factor | BJ273342 |  | -2.188 |  |  |  |  | |
| Ta.5307.1.S1_at | Glutathione synthetase | CK156077 |  | -2.183 |  |  |  |  | |
| Ta.894.1.S1_x_at | Glucose-6-phosphate isomerase | BG908976 |  | -2.169 |  |  |  |  | |
| Ta.30944.1.S1_at | Glutathione transferase F2 | AJ440791.1 |  | -2.165 |  |  |  |  | |
| Ta.39.2.S1_at | Starch branching enzyme I | AF286317.1 |  | -2.16 |  |  |  |  | |
| Ta.28714.1.A1_s_at | Thiol-specific antioxidant protein | CK211498 |  | -2.155 |  |  |  |  | |
| Ta.204.1.S1_at | Small heat shock protein Hsp23.6 | AF104108.1 |  | -2.151 |  |  |  |  | |
| Ta.28851.1.S1_at | Nuclear matrix protein 1 | BJ285745 |  | -2.151 |  |  |  |  | |
| Ta.27660.1.S1_at | rRbulose-1,5-bisphosphate carboxylase activase | CK216184 |  | -2.132 |  |  |  |  | |
| Ta.4296.1.S1_at | Neutral ceramidase | CD908406 |  | -2.128 |  |  |  |  | |
| Ta.7378.3.S1_at | Protein H2B-6 | BJ319734 |  | -2.119 |  |  |  |  | |
| Ta.1526.1.S1_x_at | Lipid transfer protein precursor | AF334185.1 |  | -2.119 |  |  |  |  | |
| Ta.39.1.S1_x_at | Starch branching enyzyme 1 | AF076679.1 |  | -2.105 |  |  |  |  | |
| Ta.28265.1.S1_at | Oxygen-evolving complex precursor | CK213341 |  | -2.101 |  |  |  |  | |
| Ta.10463.1.A1_at | Protein kinase | CD876249 |  | -2.096 |  |  |  |  | |
| Ta.27660.1.S1_x_at | Ribulose-1,5-bisphosphate carboxylase activase | CK216184 |  | -2.088 |  |  |  |  | |
| Ta.894.1.S1_at | Glucose-6-phosphate isomerase | BG908976 |  | -2.07 |  |  |  |  | |
| Ta.13170.1.S1_at | Fasciclin-like protein FLA9 | CD452786 |  | -2.058 |  |  |  |  | |
| Ta.26215.1.S1_at | MIKC-type MADS-box transcription factor WM12 | CD452875 |  | -2.041 |  |  |  |  | |

*Continued Supplementary Table S2*

| **Probe set ID** | **Functional description** | **Represent sequence ID** | **Ratio (1 d)** | **Ratio (3 d)** | **Subzero acclimation1** | | **Freeze in barley2** | |
| --- | --- | --- | --- | --- | --- | --- | --- | --- |
| **Probe set ID** | **up/**  **down** | **Probe set ID** | **up/**  **down** |
| Ta.27728.1.S1_at | Triose phosphate translocator | AF314182.2 |  | -2.033 |  |  |  |  |
| Ta.29895.1.A1_at | Phosphomannomutase | CK198230 |  | -2.033 |  |  |  |  |
| Ta.21350.2.S1_at | Wrsi5-1 protein | BJ224860 |  | -2.012 |  |  |  |  |
| Ta.27771.1.S1_at | Pyruvate orthophosphate dikinase | CD867657 |  | -2 |  |  |  |  |

**Notes:**

1 Microarray data of subzero acclimation in bread wheat were reported by Herman et al. (2006)

2 Microarray data of spring freeze response in barley were reported by Koo et al. (2008)

Because there were many differences between the results of this present study and those of the above two other studies, such as GenChips, species, experimental designs, and the statistical cut-off, etc, fold changes in the above two studies were not indicated, and changes at transcriptional levels of genes were indicated in this table using "up" (up-regulated) or "down"(down-regulated) in the above studies
